# Supplementary material
Source: PubMed Central journal article supplement (PMC6902686)
Supplement: fj.201900504R.sd1.pdf [file fj.201900504R.sd1.pdf]

# Prothymosin $\alpha$ promotes STAT3 acetylation to induce cystogenesis in Pkd1-deficient mice

Yi-Cheng Chen, Yu-Chu Su, Gia-Shing Shieh, Bing-Hua Su, Pei-Hsin Huang, Si-Tse Jiang, Ai-Li Shiau, Chao-Liang Wu

## Supplementary Figure S1

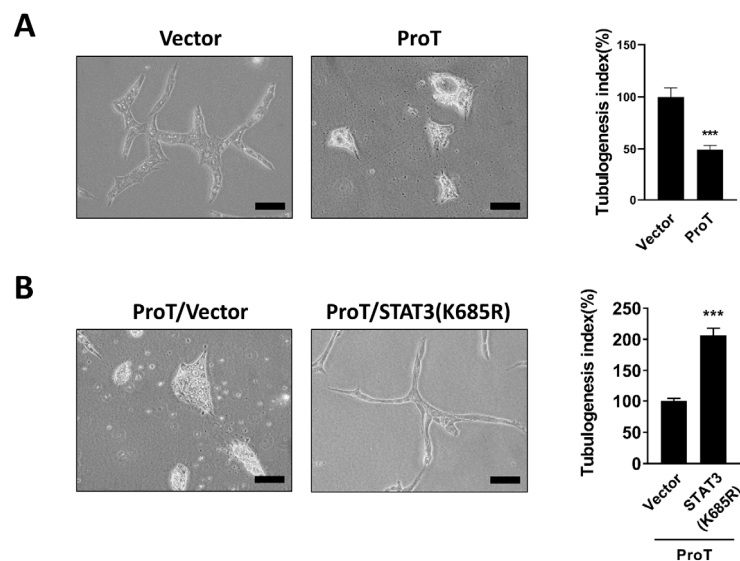

**Figure S1. Inhibition of STAT3 ameliorate cystogenesis in ProT overexpressing MDCK cells.** (A) MDCK stably expressing ProT or a control vector was cultured with HGF (20 ng/ml) in a three-dimensional collagen gel. (B) Stable expression occurred in dominant-negative STAT3 (K685R-mutated STAT3) in ProT overexpressing MDCK cells and in the cultures with HGF (20 ng/ml) in the three-dimensional collagen gel. After 72 hours, the circumference of each colony (cyst and tube) was measured using MetaMorph software and analyzed ( $***P < 0.001$ ; mean  $\pm$  SEM; Student's t-test). The experiment of all group was independently performed three times, and the fields were randomly selected at a 4X magnification to measure the circumference of each colony (cyst and tube; mean  $\pm$  SEM) by MetaMorph software and quantified using a Student's t-test.  $***p < 0.001$ . All photos are shown at a 200X magnification.
